# Supplementary material for: Social Cognitions and Mental Health as Predictors of Adolescents’ Mindfulness Practice
Source: Springer Nature journal article supplement (doi:10.1007/s12671-020-01331-8), 2020-02-21
Supplement: MOESM1 [file 17730158]

Supplementary Tables and Figures

Table A1

*Correlations*

|  | Week | 1 | 2 | 3 | 4 | 5 | 6 | 7 | 8 | 9 | 10 | 11 | 12 | 13 | 14 | 15 |
| --- | --- | --- | --- | --- | --- | --- | --- | --- | --- | --- | --- | --- | --- | --- | --- | --- |
|  |  |  |  |  |  |  |  |  |  |  |  |  |  |  |  |  |
| 1. Resilience | 0 |  | -.53‡  -.37‡ | -.50‡  -.42‡ | -.34‡  -.26‡ | .27‡  .36‡ | -.18†  -.19‡ | .21†  .19‡ | .04  .10‡ | .36‡  .34‡ | .08  .11 | -.04  .07 | .04  -.00 | .07  -.01 | .02  .11 | .06  .06 |
| 1. Depressive Symptoms | 0 | -.47‡ |  | .61‡  .47‡ | .35‡  .29‡ | -.25‡  -.18‡ | .14‡  .09 | -.14‡  -.08 | -.07  -.07 | -.31‡  -24‡ | -.04  -.07 | .05  .04 | .02  .04 | .01  .05 | .02  -.05 | .03  -.01 |
| 1. Internalization | 0 | -.46‡ | .55‡ |  | .34‡  .41‡ | -.18‡  -.25‡ | .13†  .16‡ | -.12†  -.14† | -.09  -.03 | -.34‡  -.27‡ | -.01  -.01 | .03  .15‡ | .02  .11 | -.01  .10 | -.02  .06 | .04  .01 |
| 1. Externalization | 0 | -.30‡ | .31‡ | .36‡ |  | -.23‡  -.30‡ | .22‡  .20‡ | -.19‡  -.19‡ | .00  .01 | -.17‡  -.20‡ | -.15‡  -.05 | -.05  .07 | -.09  .10 | -.08  .09 | -.08  .07 | -.05  .09 |
| 1. Positive Outcome Expectancies | 10 | .31‡ | -.22‡ | -.22‡ | -.27‡ |  | -.53‡  -.31‡ | .30‡  .36‡ | .27‡  .34‡ | .28‡  .31‡ | .45‡  .32‡ | .21‡  .02 | .22‡  .05 | .20‡  -.01 | .30‡  .16‡ | .12  -.03 |
| 1. Negative Outcome Expectancies | 10 | -.18‡ | .11‡ | .13‡ | .22‡ | -.42‡ |  | -.25‡  -.25‡ | -.28‡  -.06 | -.21‡  -.17‡ | -.40‡  -.18‡ | -.25‡  -.11 | -.22‡  -.09 | -.19‡  -.07 | -.23‡  .03 | -.14†  -.00 |
| 1. Injunctive Norms | 10 | .19‡ | -.09‡ | -.10‡ | -.19‡ | .33‡ | -.26‡ |  | .17‡  .37‡ | .27‡  .22‡ | .31‡  .36‡ | .15‡  .12† | .10  .11 | .08  .07 | .17‡  .15‡ | .01  .01 |
| 1. Descriptive Norm | 10 | .07 | -.08 | -.07 | .01 | .31‡ | -.16‡ | .26‡ |  | .13†  .13† | .50‡  .52‡ | .35‡  .30‡ | .31‡  .31‡ | .26‡  .26‡ | .37‡  .39‡ | .15‡  .19‡ |
| 1. Perceived Behavioral Control | 10 | .35‡ | -.28‡ | -.32‡ | -.18‡ | .29‡ | -.18‡ | .22‡ | .14‡ |  | .16‡  .12† | .02  -.05 | .04  .01 | .06  .02 | .06  .01 | .06  .01 |
| 1. Intention | 10 | .09‡ | -.04 | .01 | -.10‡ | .38‡ | -.29‡ | .34‡ | .51‡ | .13‡ |  | .50‡  .43‡ | .40‡  .35‡ | .33‡  .32‡ | .52‡  .52‡ | .31‡  .30‡ |
| 1. Practice   Wks 1-9 | 10 | .02 | .04 | .09‡ | .03 | .11‡ | -.17‡ | .12‡ | .32‡ | -.01 | .46‡ |  | .39‡  .38‡ | .36‡  -34‡ | .39‡  .40‡ | .31‡  .30‡ |
| 1. Practice   Wks 10-26 | 26 | .01 | .02 | .06 | .03 | .12‡ | -.13‡ | .08 | .32‡ | .04 | .35‡ | .39‡ |  | .86‡  .89‡ | .39‡  25‡ | .50‡  .45‡ |
| 1. Practice   Wks 23-26 | 26 | .02 | .02 | .04 | .04 | .08 | -.11‡ | .05 | .27‡ | .05 | .31‡ | .35‡ | .89‡ |  | .34‡  .27‡ | .44‡  .41‡ |
| 1. Use of MF | 10 | .07 | -.02 | .01 | .01 | .23‡ | -.09† | .13‡ | .39‡ | .05 | .51‡ | .39‡ | .31‡ | .31‡ |  | .41‡  .30‡ |
| 1. Use of MF | 26 | .06 | -.01 | .01 | .04 | .05 | -.05 | -.03 | .19‡ | .02 | .28‡ | .34‡ | .48‡ | .43‡ | .37‡ |  |

*Note*. N=938-1228, ngirls=481-610, nboys=451-618. Correlation coefficients for the total sample are shown below the diagonal and correlation coefficients for girls and boys are shown above the diagonal with girls’ coefficients on the top and boys’ coefficients on the bottom. † p≤.01, ‡ p≤.001

Table A2

|  | Use of a Mindfulness Exercise to Relax  10 Weeks | | | | Practice  Weeks 1-9 | | | | Practice  Weeks 23-26 | | | | Use of a Mindfulness Exercise to Relax  26 Weeks | | | |
| --- | --- | --- | --- | --- | --- | --- | --- | --- | --- | --- | --- | --- | --- | --- | --- | --- |
|  | β  [CI] | p | b  [CI] | p | β  [CI] | *p* | *b*  [CI] | *p* | β  [CI] | *p* | *b*  [CI] | *p* | β  [CI] | **p** | b  [CI] | **p** |
| Indirect |  |  |  |  |  |  |  |  |  |  |  |  |  |  |  |  |
| Positive Outcome  Expectancies | .07  [.04, .09] | .000 | .07  [.04, .09] | .000 | .06  [.04, .09] | .000 | .08  [.04, .11] | .000 | .04  [.02, .06] | .000 | .03  [.01, .04] | .000 | .04  [.02, .06] | .000 | .04  [.02, .06] | .000 |
| Negative Outcome  Expectancies | -.05  [-.08, -.03] | .000 | -.04  [-.06, -.02] | .000 | -.05  [-.08, -.02] | .000 | -.05  [-.08, -.03] | .000 | -.03  [-.05, -.01] | .001 | -.02  [-.03, -.01] | .000 | -.03  [-.05, -.01] | .001 | -.03  [-.04, -.01] | .001 |
| Injunctive Norms | .07  [.04, .09] | .000 | .06  [.03, .08] | .000 | .07  [.03, .09] | .000 | .07  [.04, .09] | .000 | .04  [.02, .06] | .000 | .02  [.01, .03] | .000 | .04  [.02, .06] | .000 | .03  [.02, .05] | .000 |
| Descriptive Norms | .17  [.14, .20] | .000 | .13  [.11, .16] | .000 | .17  [.12, .21] | .000 | .16  [.12, .19] | .000 | .10  [.06, .14] | .000 | .05  [.03, .07] | .000 | .10  [.07, .14] | .000 | .08  [.05, .11] | .000 |
| Perceived Behavioral Control | -.01  [-.03, .01] | .291 | -.02  [-.05, .01] | .295 | -.01  [-.04, .01] | .292 | -.02  [-.05, .02] | .291 | -.01  [-.02, .01] | .305 | -.01  [-.02, .01] | .307 | -.01  [-.02, .01] | .307 | -.01  [-.03, .01] | .310 |

*RAA Results: Indirect effects via Intention*

*Note.* Direct coefficients, confidence intervals, and the variance explained by the models can be found in Figures A1-A4. In the models of practice at 10 weeks, intention to practice in the future is set to predict past mindfulness practice retroactively. Still, mindfulness practice measured at 10 weeks is more strongly associated with intention to practice in the future perhaps because intention is based on past behavior as has been found in other research (Hagger, Polet, & Lintunen, 2018). Mindfulness practice at 10 weeks includes measures of each specific exercise, while mindfulness practice at 26 asks about length and two other types of exercises. In other words, the mean score measures of practice varied between 10-week and 26-week surveys. Therefore, there is room for more error when compared. On the other hand, the single-item measures of practice are the same from time-point to time-point but are less specific. The length and the formal versus informal distinction could not be clearly made at each time point with the single-item or mean score measures. Furthermore, at 10 weeks, it is possible to compare formal vs. informal but not length and at 26 weeks it is possible to compare length but not formal vs. informal.

Table A3

*Mental Health Results for Single-Item Measures of Mindfulness Practice*

|  |  |  | Use of a Mindfulness Exercise to Relax  10 Weeks | | | | Practice  Wks 1-9 | | | | Practice  Wks 23-26 | | | | Use of a Mindfulness Exercise to Relax  26 Weeks | | | |
| --- | --- | --- | --- | --- | --- | --- | --- | --- | --- | --- | --- | --- | --- | --- | --- | --- | --- | --- |
|  | Gender |  | β  [CI] | ***p*** | β  [CI] | ***p*** | β  [CI] | ***p*** | *b*  [CI] | ***p*** | β | ***p*** | *b*  [CI] | ***p*** | *b*  [CI] | ***p*** | *b*  [CI] | ***p*** |
| Resilience | All |  | .09  [.02, .16] | .012 | .08  [-.02, .16] | .101 | .08  [-.02, .16] | .101 | .01  [-.00, .02] | .109 | .06  [-.03, .15] | .214 | .00  [-.00, .01] | .218 | .01  [-.00, .02] | .109 | .01  [.00, .01] | .011 |
| Girls |  | .03  [-.06, .11] | .521 | -.03  [-.16, .11] | .692 | -.03  [-.16, .11] | .692 | -.00  [-.01, .01] | .692 | .11  [-.00, .22] | .053 | .00  [.00, .01] | .044 | -.00  [-.01, .01] | .692 | .01  [.00, .02] | .063 |
| Boys |  | .15  [.04, .25] | .006 | .15  [.02, .28] | .021 | .15  [.02, .28] | .021 | .02  [.00, .03] | .031 | .05  [-.08, .17] | .461 | .00  [-.01, .01] | .469 | .02  [.00, .03] | .031 | .01  [.00, .01] | .037 |
| Depressive Symptoms | All |  | -.01  [-.12, .10] | .885 | .02  [-.08, .12] | .661 | .02  [-.08, .12] | .661 | .01  [-.02, .03] | .660 | .01  [-.10, .11] | .925 | .00  [-,01, .02] | .925 | .01  [-.02, .03] | .660 | .00  [-.02, .02] | .699 |
| Girls |  | .08  [-.07, .23] | .287 | .07  [-.05, .18] | .269 | .07  [-.05, .18] | .269 | .01  [-.01, .04] | .270 | .08  [-.03, .19] | .134 | .01  [-.00, .02] | .113 | .01  [-.01, .04] | .270 | .01  [-.01, .04] | .239 |
| Boys |  | -.07  [-.02, .07] | .330 | .01  [-.18, .20] | .938 | .01  [-.18, .20] | .938 | .00  [-.06, .06] | .938 | .01  [-.16, .17] | .940 | .00  [-.03, .03] | .940 | .00  [-.06, .06] | .938 | -.00  [-.04, .03] | .974 |
| Internalisation | All |  | .05  [-.04, .14] | .271 | .12  [.02, .21] | .018 | .12  [.02, .21] | .018 | .04  [.01, .07] | .022 | .06  [-.05, .17] | .258 | .01  [-.01, .03] | .260 | .04  [.01, .07] | .022 | .01  [-.02, .03] | .694 |
| Girls |  | -.02  [-.12, .09] | .772 | .01  [-.10, .12] | .825 | .01  [-.10, .12] | .825 | .00  [-.03, .03] | .825 | .02  [-.10, .07] | .692 | .00  [-.01, .02] | .691 | .00  [-.03, .03] | .825 | .02  [-.01, .04] | .180 |
| Boys |  | .12  [-.01, .25] | .073 | .20  [.06, .34] | .004 | .20  [.06, .34] | .004 | .07  [.02, .12] | .007 | .10  [-.04, .24] | .168 | .02  [-.01, .05] | .169 | .07  [.02, .12] | .007 | .00  [-.04, .04] | .933 |
| Externalisation | All |  | .03  [-.03, .10] | .351 | .01  [-.07, .10] | .742 | .01  [-.07, .10] | .742 | .00  [-.02, .03] | .743 | .04  [-.08, .15] | .519 | .01  [-.01, .03] | .524 | .00  [-.02, .03] | .743 | .02  [-.01, .04] | .250 |
| Girls |  | -.08  [-.17, .00] | .052 | -.07  [-.19, .04] | .206 | -.07  [-.19, .04] | .206 | -.02  [-.05, .01] | .205 | -.08  [-.21, .05] | .227 | -.01  [-.03, .01] | .211 | -.02  [-.05, .01] | .205 | -.02  [-.05, .02] | .312 |
| Boys |  | .09  [-.01, .19] | .069 | .05  [-.05, .14] | .316 | .05  [-.05, .14] | .316 | .02  [-.02, .05] | .321 | .08  [-.08, .23] | .332 | .02  [-.02, .05] | .344 | .02  [-.02, .05] | .321 | .03  [-.00, .06] | .055 |
| R­2 | All |  | R­2 = .01, *p*= .099 | | | | R­2 = .03, *p*= .038 | | | | R­2 = .01, *p*= .216 | | | | R­2 = .01, *p*= .177 | | | |
| Girls |  | R­2 = .01, *p*= .218 | | | | R­2 = .02, *p*= .182 | | | | R­2 = .02, *p*= .317 | | | | R­2 = .02, *p*= .194 | | | |
| Boys |  | R­2 = .05, *p*= .015 | | | | R­2 = .06, *p*= .015 | | | | R­2 = .02, *p*= .175 | | | | R­2 = .02, *p*= .145 | | | |


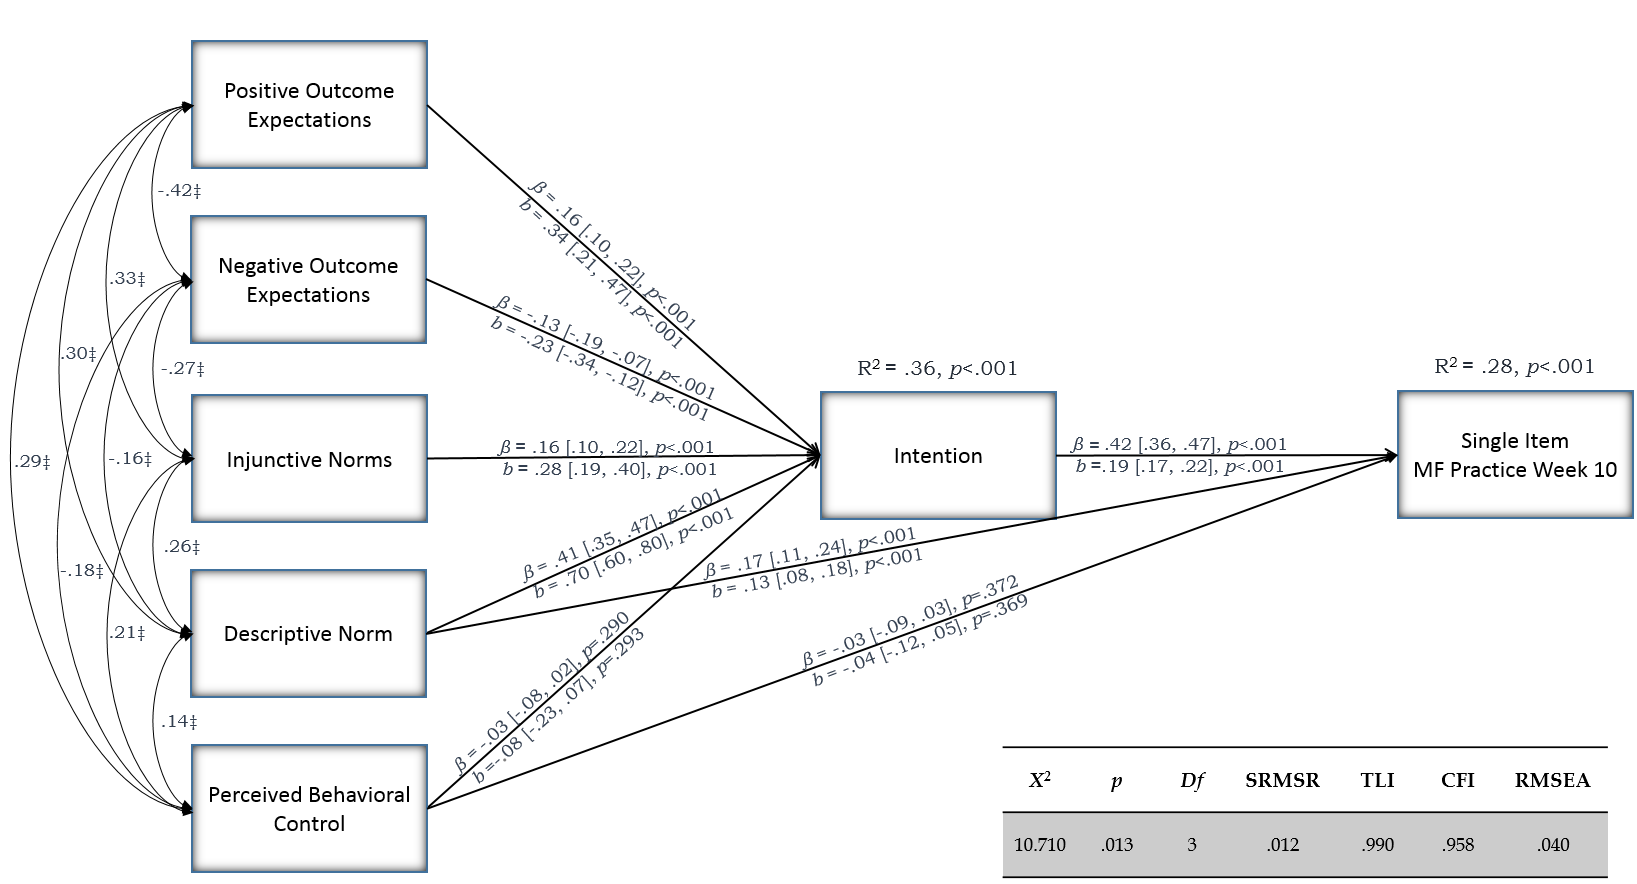


*Figure A1*. The Reasoned Action Approach Model with practice measured with a single item at week 10


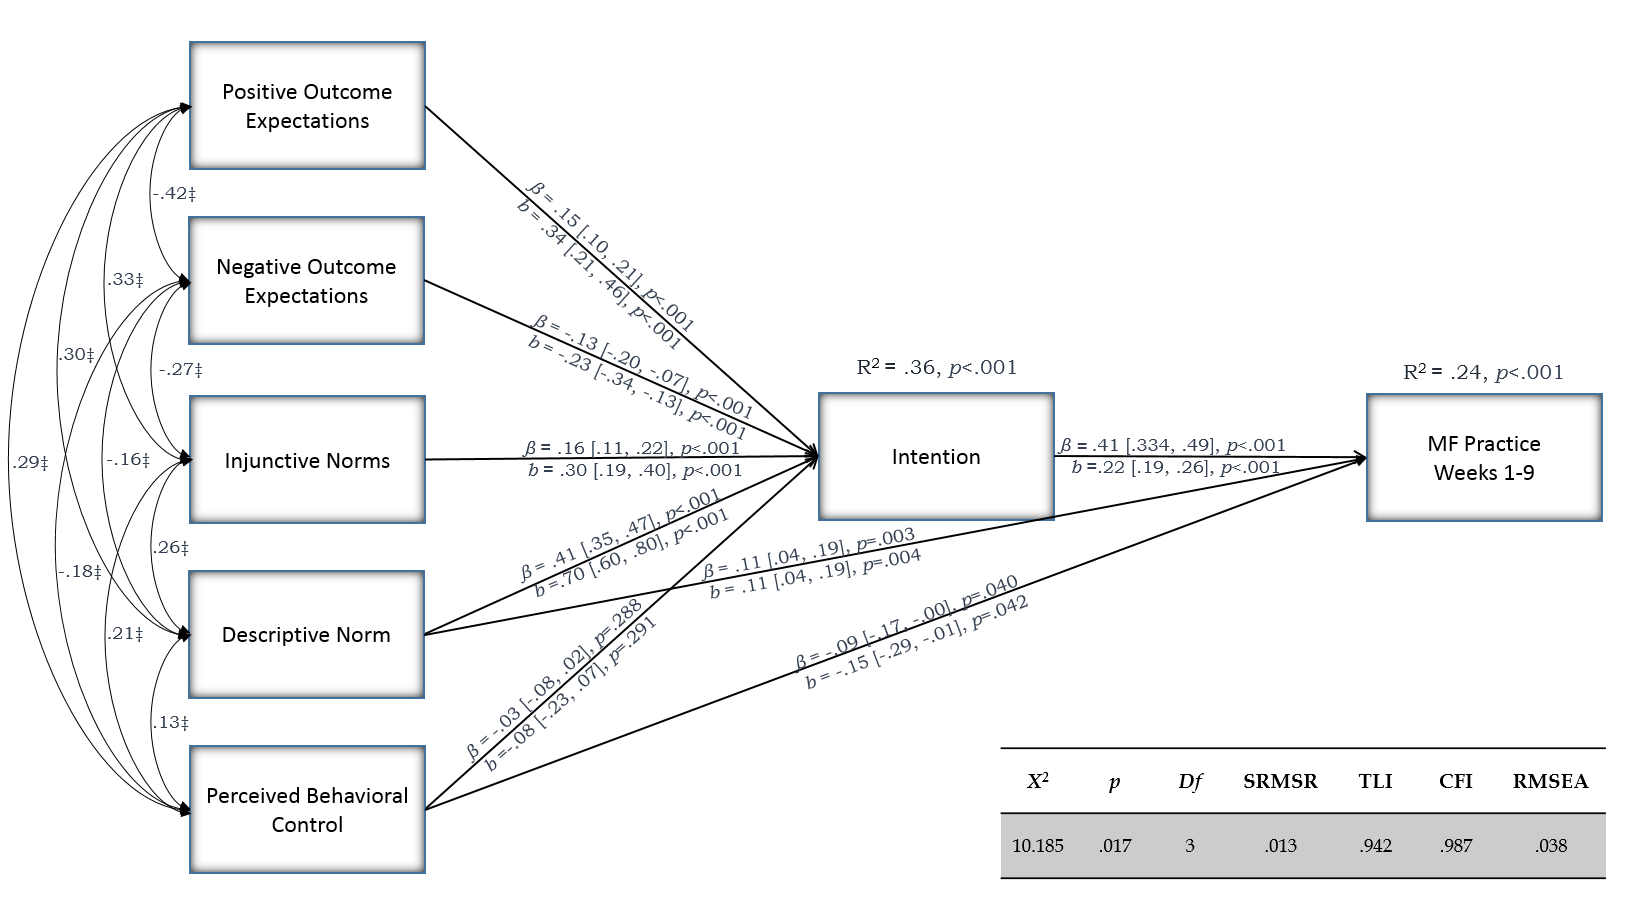
 *Figure A2.* The Reasoned Action Approach Model with practice during weeks 1-9 † p≤.01, ‡ p≤.001


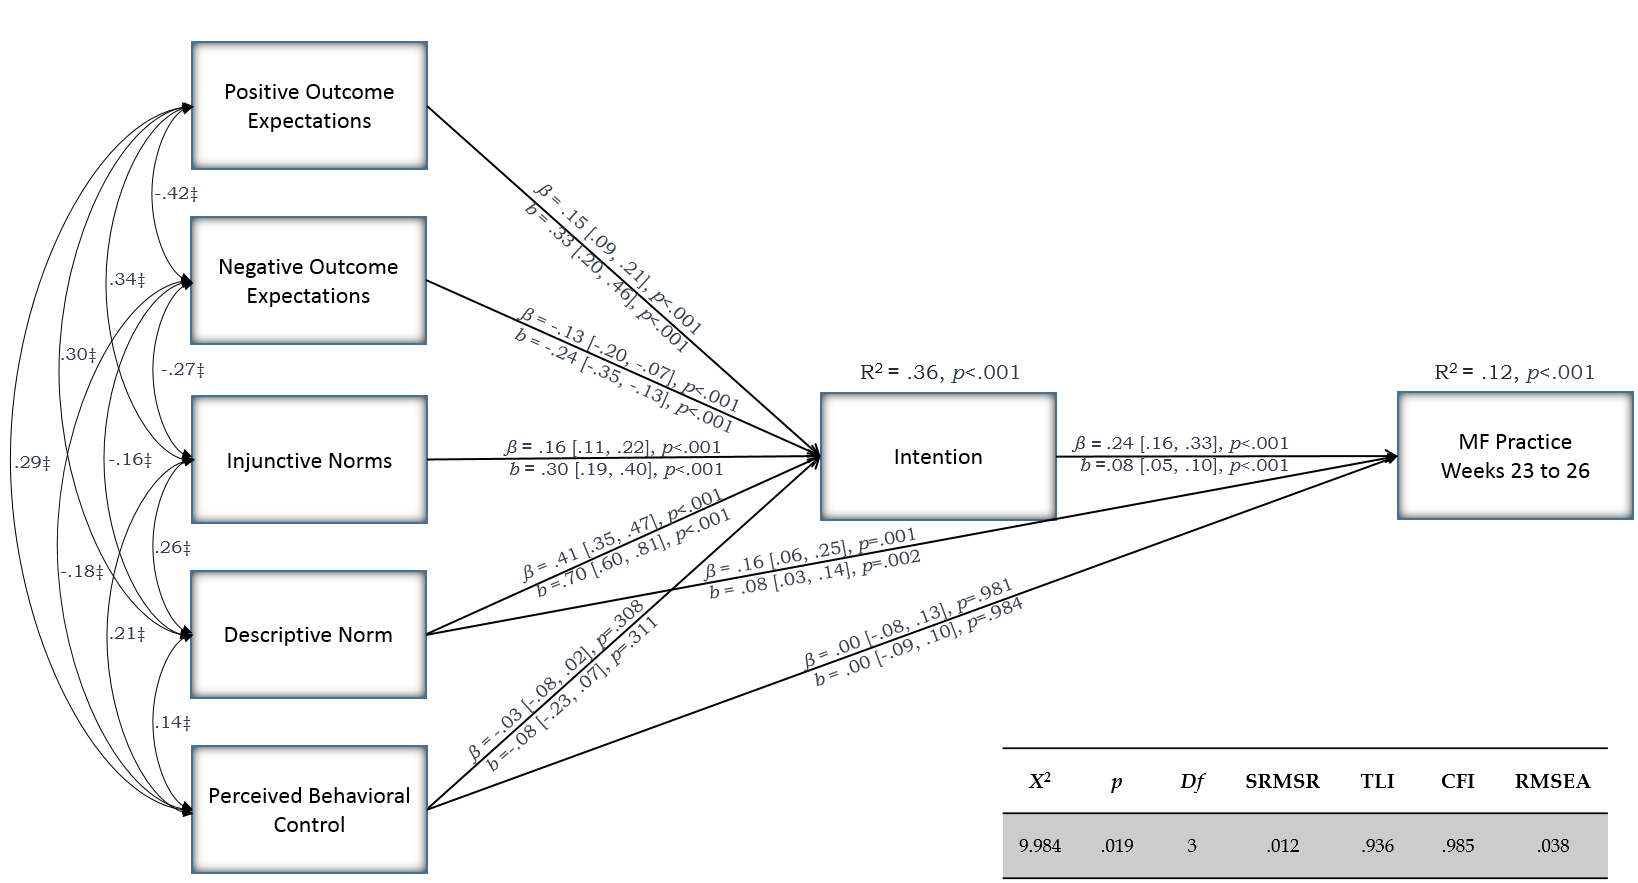
 *Figure A3*. The Reasoned Action Approach Model with practice during weeks 22-26 † p≤.01, ‡ p≤.001


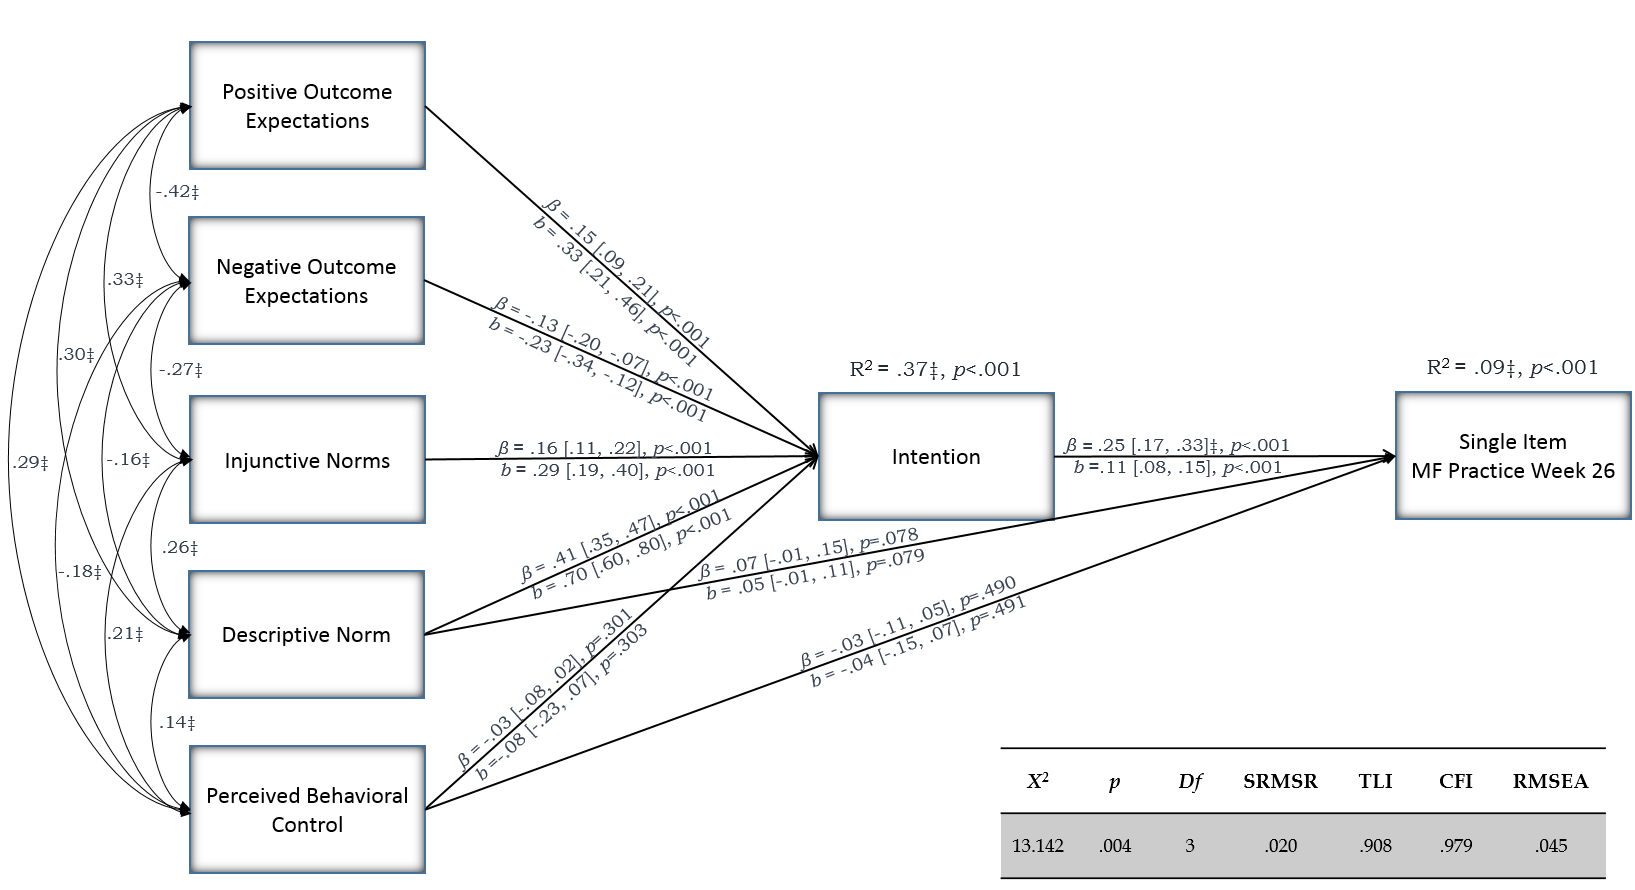


*Figure A4.* The Reasoned Action Approach Model with practice measured by a single item at 26 weeks † p≤.01, ‡ p≤.001
